# Supplementary material for: Status and physiological significance of circulating adiponectin in the very old to centenarians
Source: Research Square preprint supplement (doi:10.21203/rs.3.rs-1732332/v1), 2022-06-30
Supplement: Supplementary file 1 [file 393c9301990aaced4b42bb96.pdf]

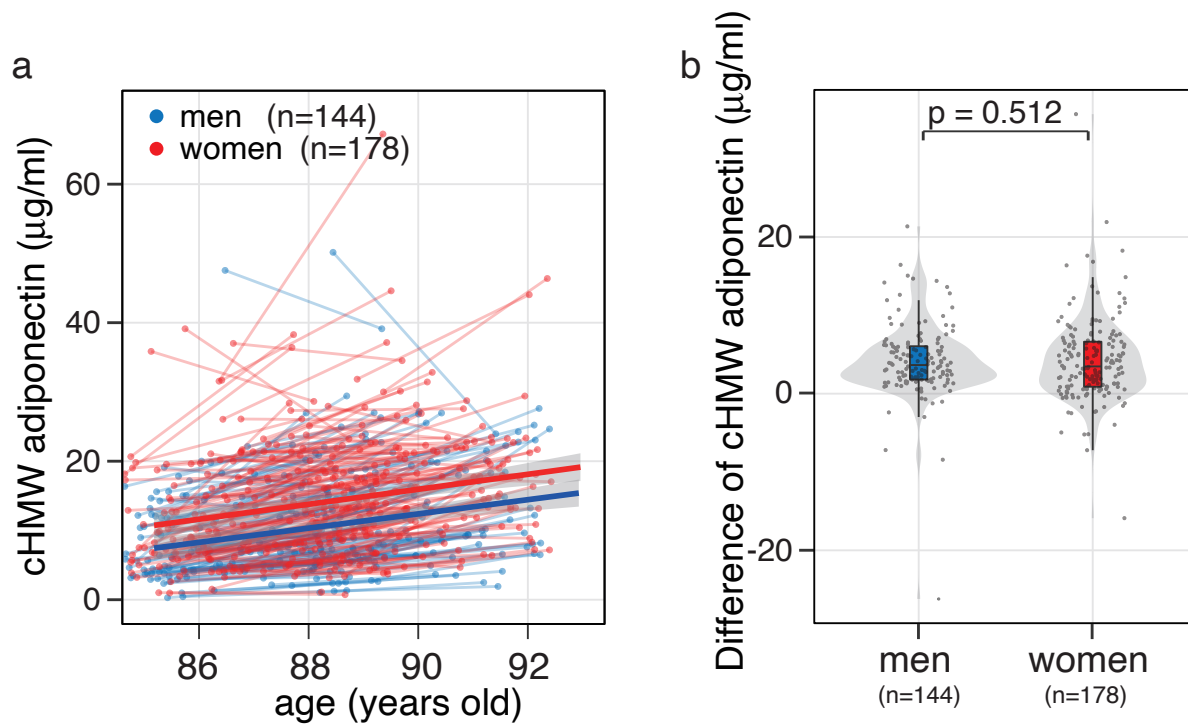

**Supplementary Fig. 1 | Transition of cHMW adiponectin level in the longitudinal data of TOOTH study**

(a), Transition of cHMW adiponectin level at baseline and 3-year follow-up studies.

(b), Difference of cHMW adiponectin level between baseline and 3-year follow-up studies.

The cHMW adiponectin level is gradually increasing during very old.

### Supplementary Fig. 2 | GWAS for cHMW adiponectin level

(a), GWAS for cHMW adiponectin level in centenarians (n=440) determined by whole genome sequencing (WGS). (b), GWAS for cHMW adiponectin level in centenarians (n=367) determined by genotyping by DNA microarray (Japanica V3 array) and DNA sequence imputation. (c), GWAS result for cHMW adiponectin level in the very old (n=1,015) determined by genotyping using DNA microarray (Asian screening array, Illumina) and DNA sequence imputation.

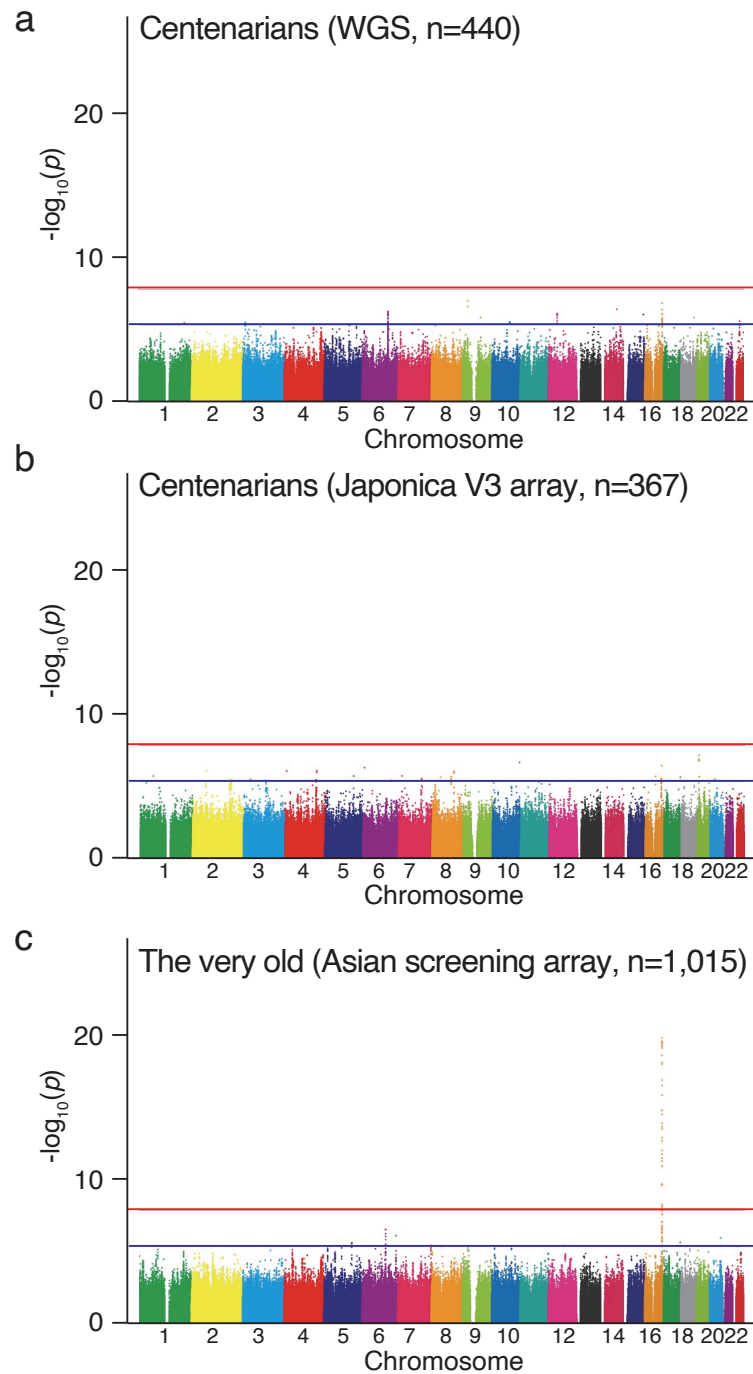

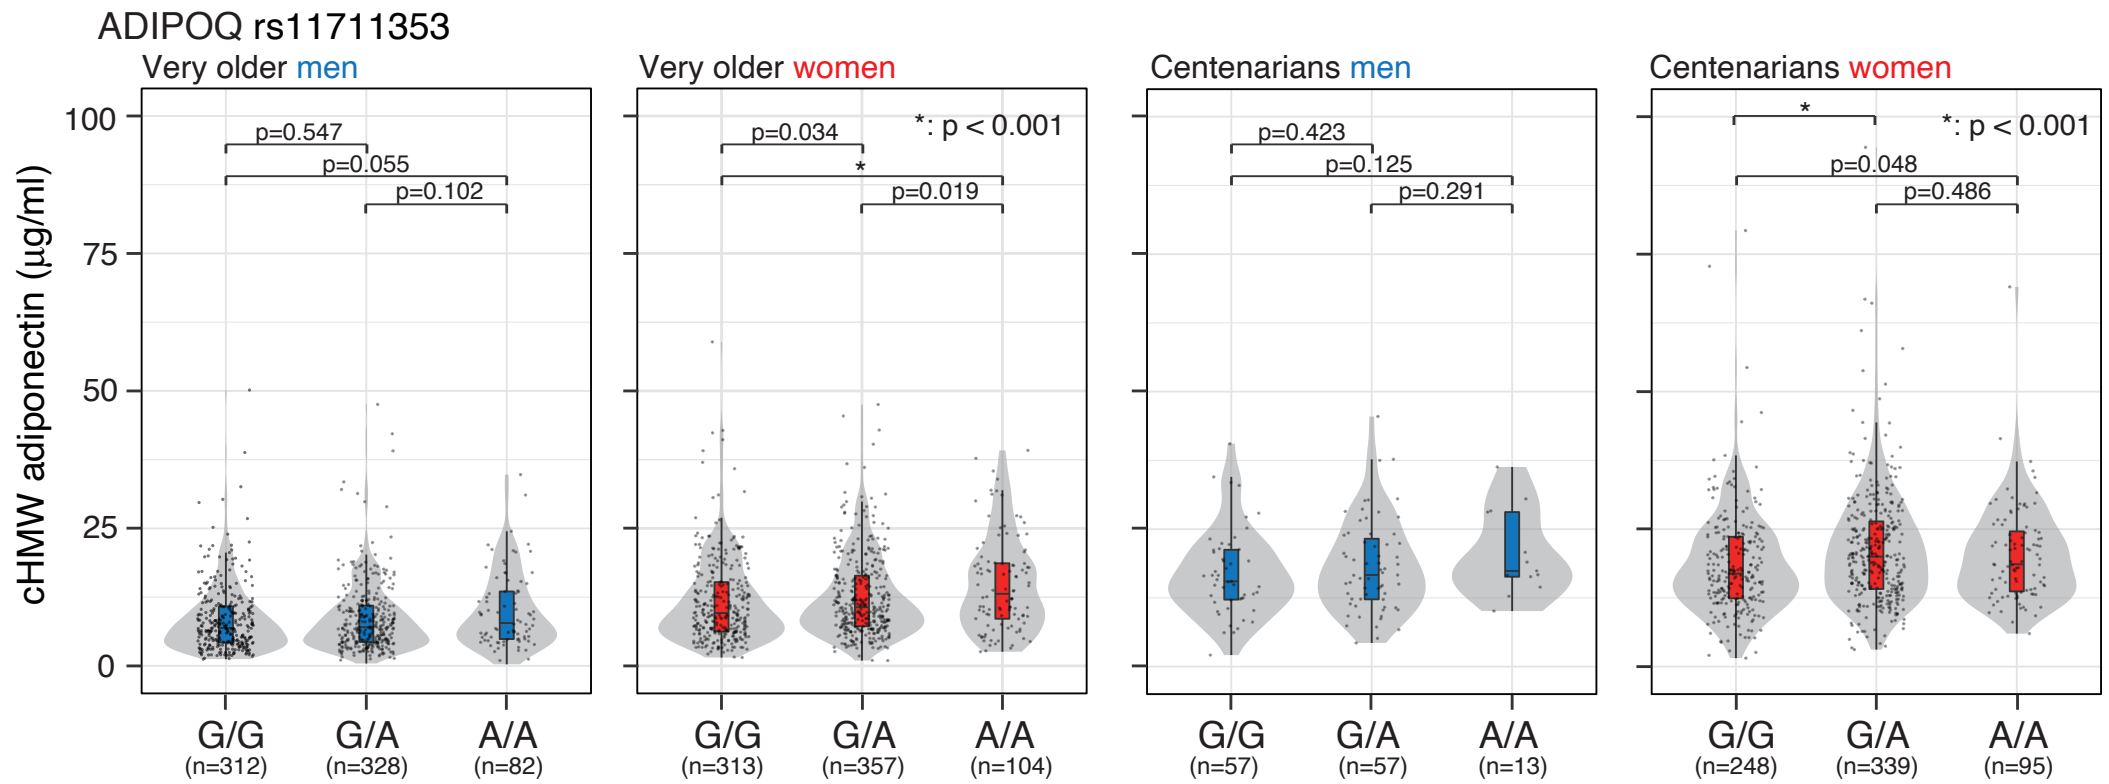

**Supplementary Fig. 3 | Distribution of cHMW adiponectin level in rs11711353 (ADIPOQ) genotypes of the very old and centenarians**

(a) The very old (85-89yo, n=1,314)

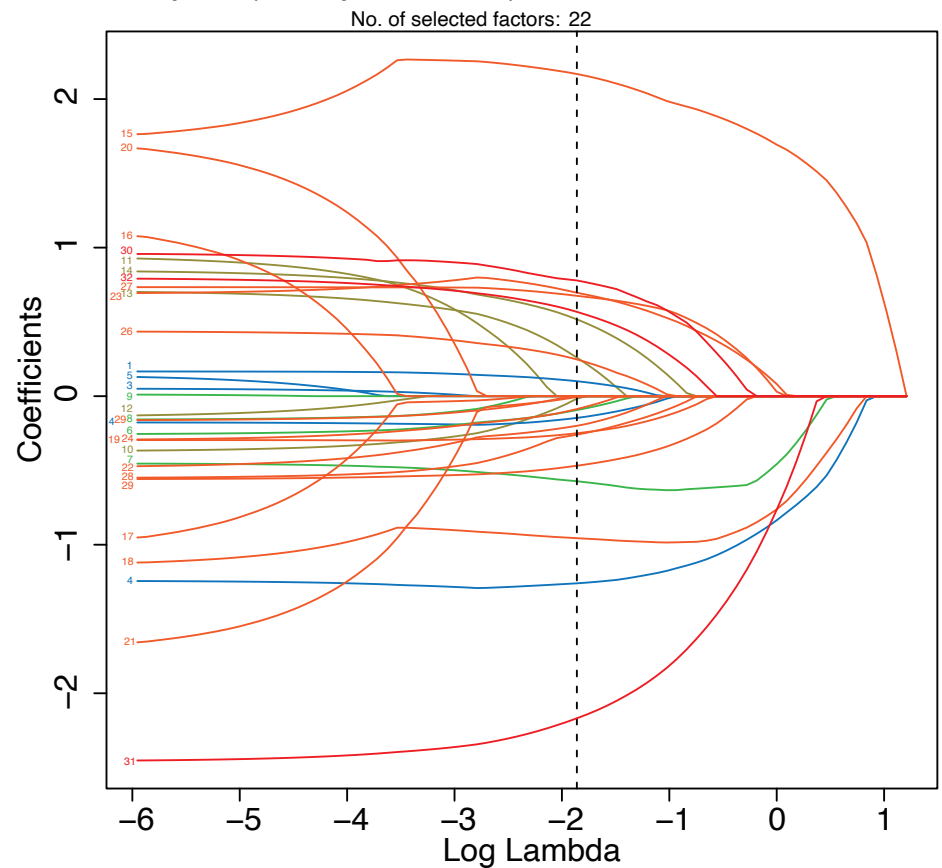

Basic information (5)

- 1 Age
- 2 BMI
- 3 SBP
- 4 Years of education
- 5 Smoking history

Physical and Cognitive function(4)

- 6 IADL score
- 7 Hand grip
- 8 Cognitive impairment
- 9 WHO5 score

Disease histories (5)

- 10 Heart disease
- 11 Diabetes
- 12 Cancers
- 13 Renal disease
- 14 Fracture

Biomarkers in blood (15)

- 15 HDLC
- 16 TCHO
- 17 LDLC
- 18 TG
- 19 CHE
- 20 AST
- 21 ALT
- 22  $\gamma$ GTP
- 23 LDH
- 24 UA
- 25 ALB
- 26 CstC
- 27 NTproBNP
- 28 HBA1c
- 29 IL6

Genetic factors (3)

- 30 SEX
- 31 *CDH13* rs4783244
- 32 *ADIPOQ* rs11711353

(b) Centenarians (100-yo, n=352)

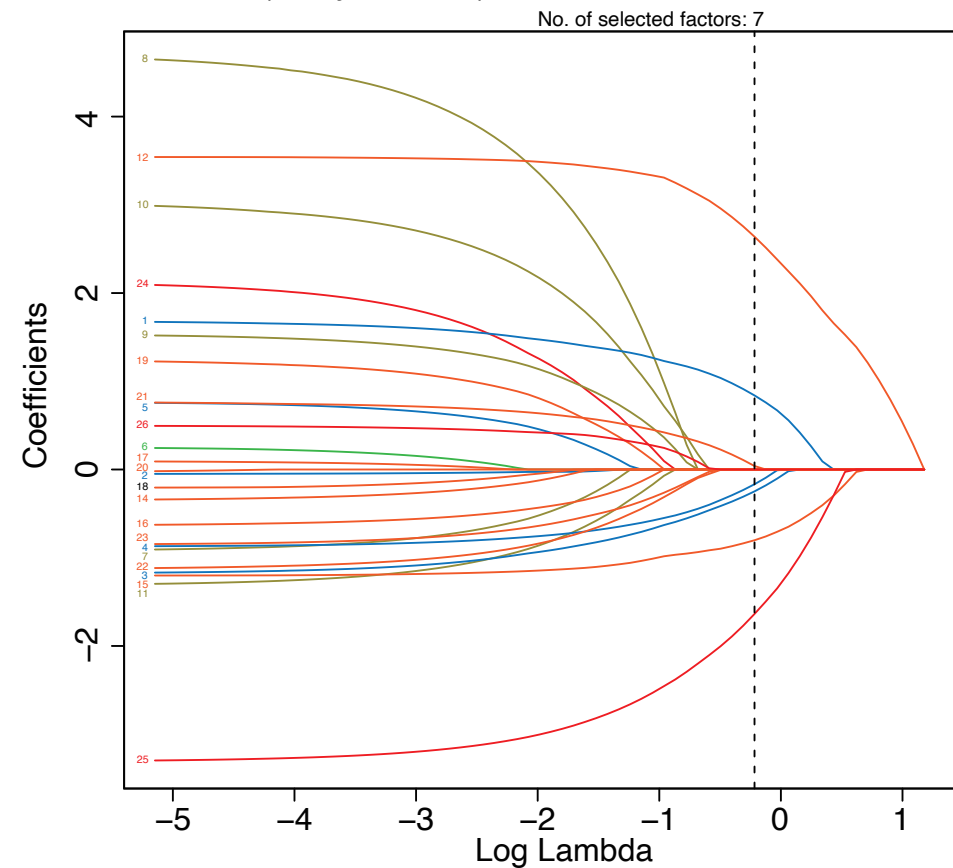

Basic information (5)

- 1 Age
- 2 BMI
- 3 SBP
- 4 Education category
- 5 Smoking history

Physical and Cognitive function(1)

- 6 ADL score

Disease histories (5)

- 7 Heart disease
- 8 Diabetes
- 9 Cancers
- 10 Renal disease
- 11 Fracture

Biomarkers in blood (12)

- 12 HDLC
- 13 TCHO
- 14 LDLC
- 15 TG
- 16 CHE
- 17  $\gamma$ GTP
- 18 UA
- 19 ALB
- 20 CstC
- 21 NTproBNP
- 22 HBA1c
- 23 IL6

Genetic factors (3)

- 24 SEX
- 25 *CDH13* rs4783244
- 26 *ADIPOQ* rs11711353

**Supplementary Fig. 4 | LASSO with five-fold cross-validation against 1,314 very old and 352 centenarians**

(a), LASSO with five-fold validation analysis against 1,314 very old. As a result of five-fold cross-validation, 22 factors shown in black in the bottom column were selected for further multivariate regression analysis. (b), LASSO with five-fold validation analysis against 352 centenarians. As a result of five-fold cross-validation, 7 factors shown in black in the bottom column were selected for further multivariate regression analysis.



**Supplementary Fig. 5 | Survival time analysis for all-cause mortality against the three quantile groups of cHMW adiponectin levels in centenarians men and women**

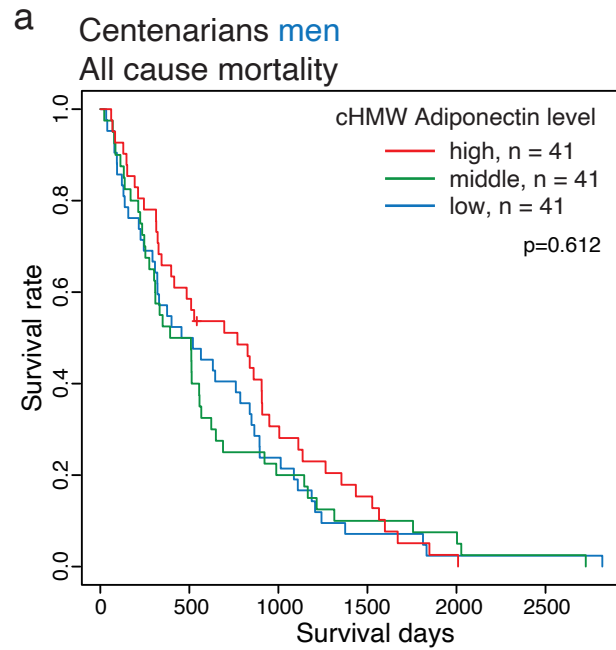

- (a), Survival analysis for all-cause mortality of Centenarian men grouped by cHMW adiponectin level. No significant difference among the three cHMW adiponectin level different groups was observed.
- (b), Survival analysis for all-cause mortality of Centenarian women grouped by cHMW adiponectin level. No significant difference among the three cHMW adiponectin level different groups was observed.

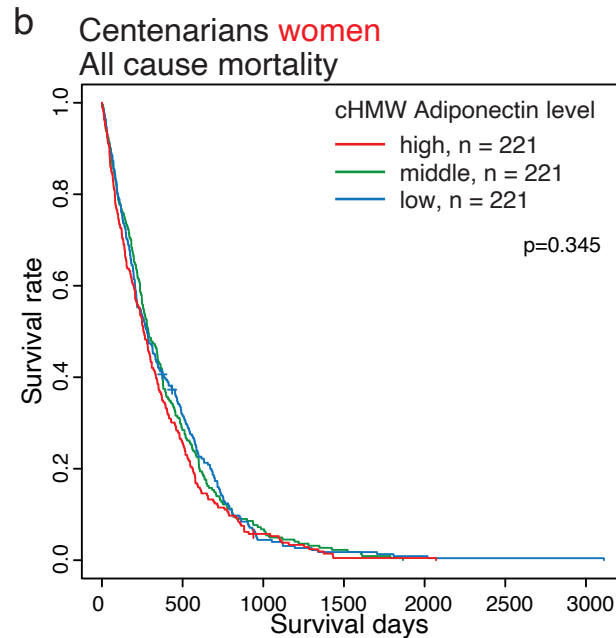

**Supplementary Fig. 6 | Survival time analysis for cancer-cause mortality against the three quantile groups of cHMW adiponectin levels in very older men and women**

(a), Survival analysis for cancer-cause mortality of very older men grouped by cHMW adiponectin level. There was no significant difference among the three cHMW adiponectin level groups in very older men. (b), Survival analysis for cancer -cause mortality of very older women grouped by cHMW adiponectin level. There was no significant difference among the three cHMW adiponectin level different groups in very older women.

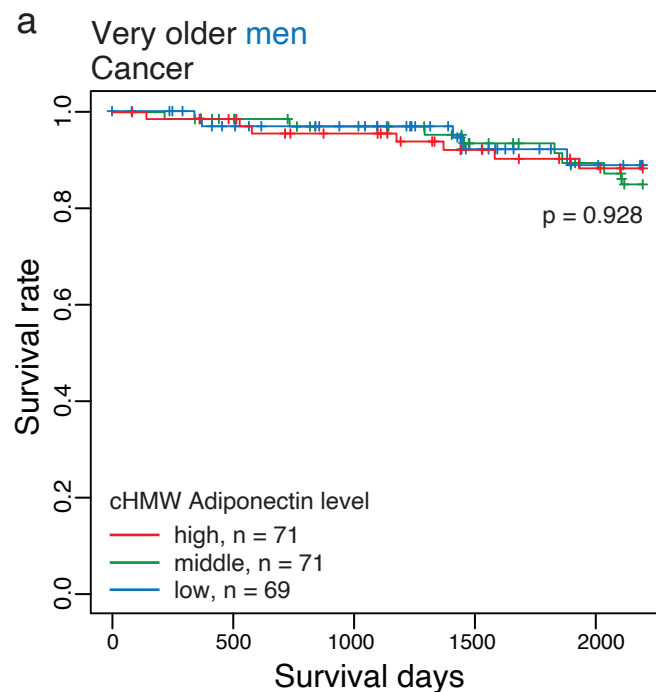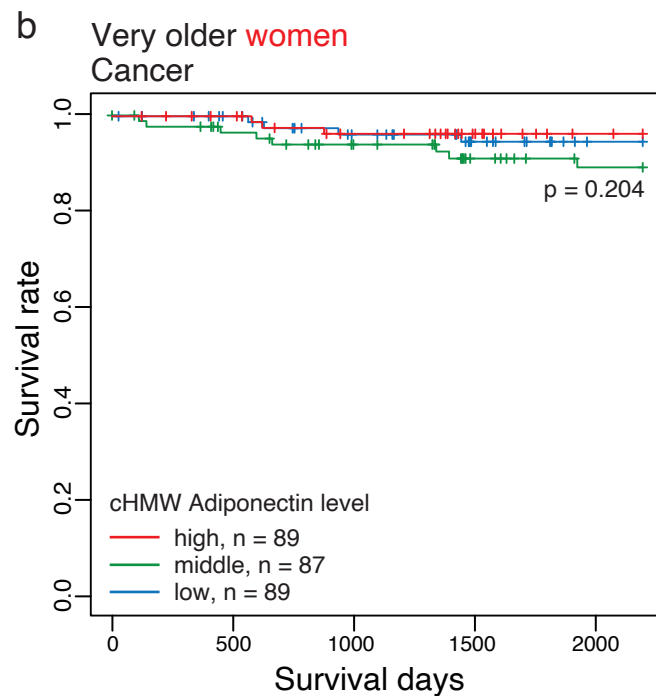

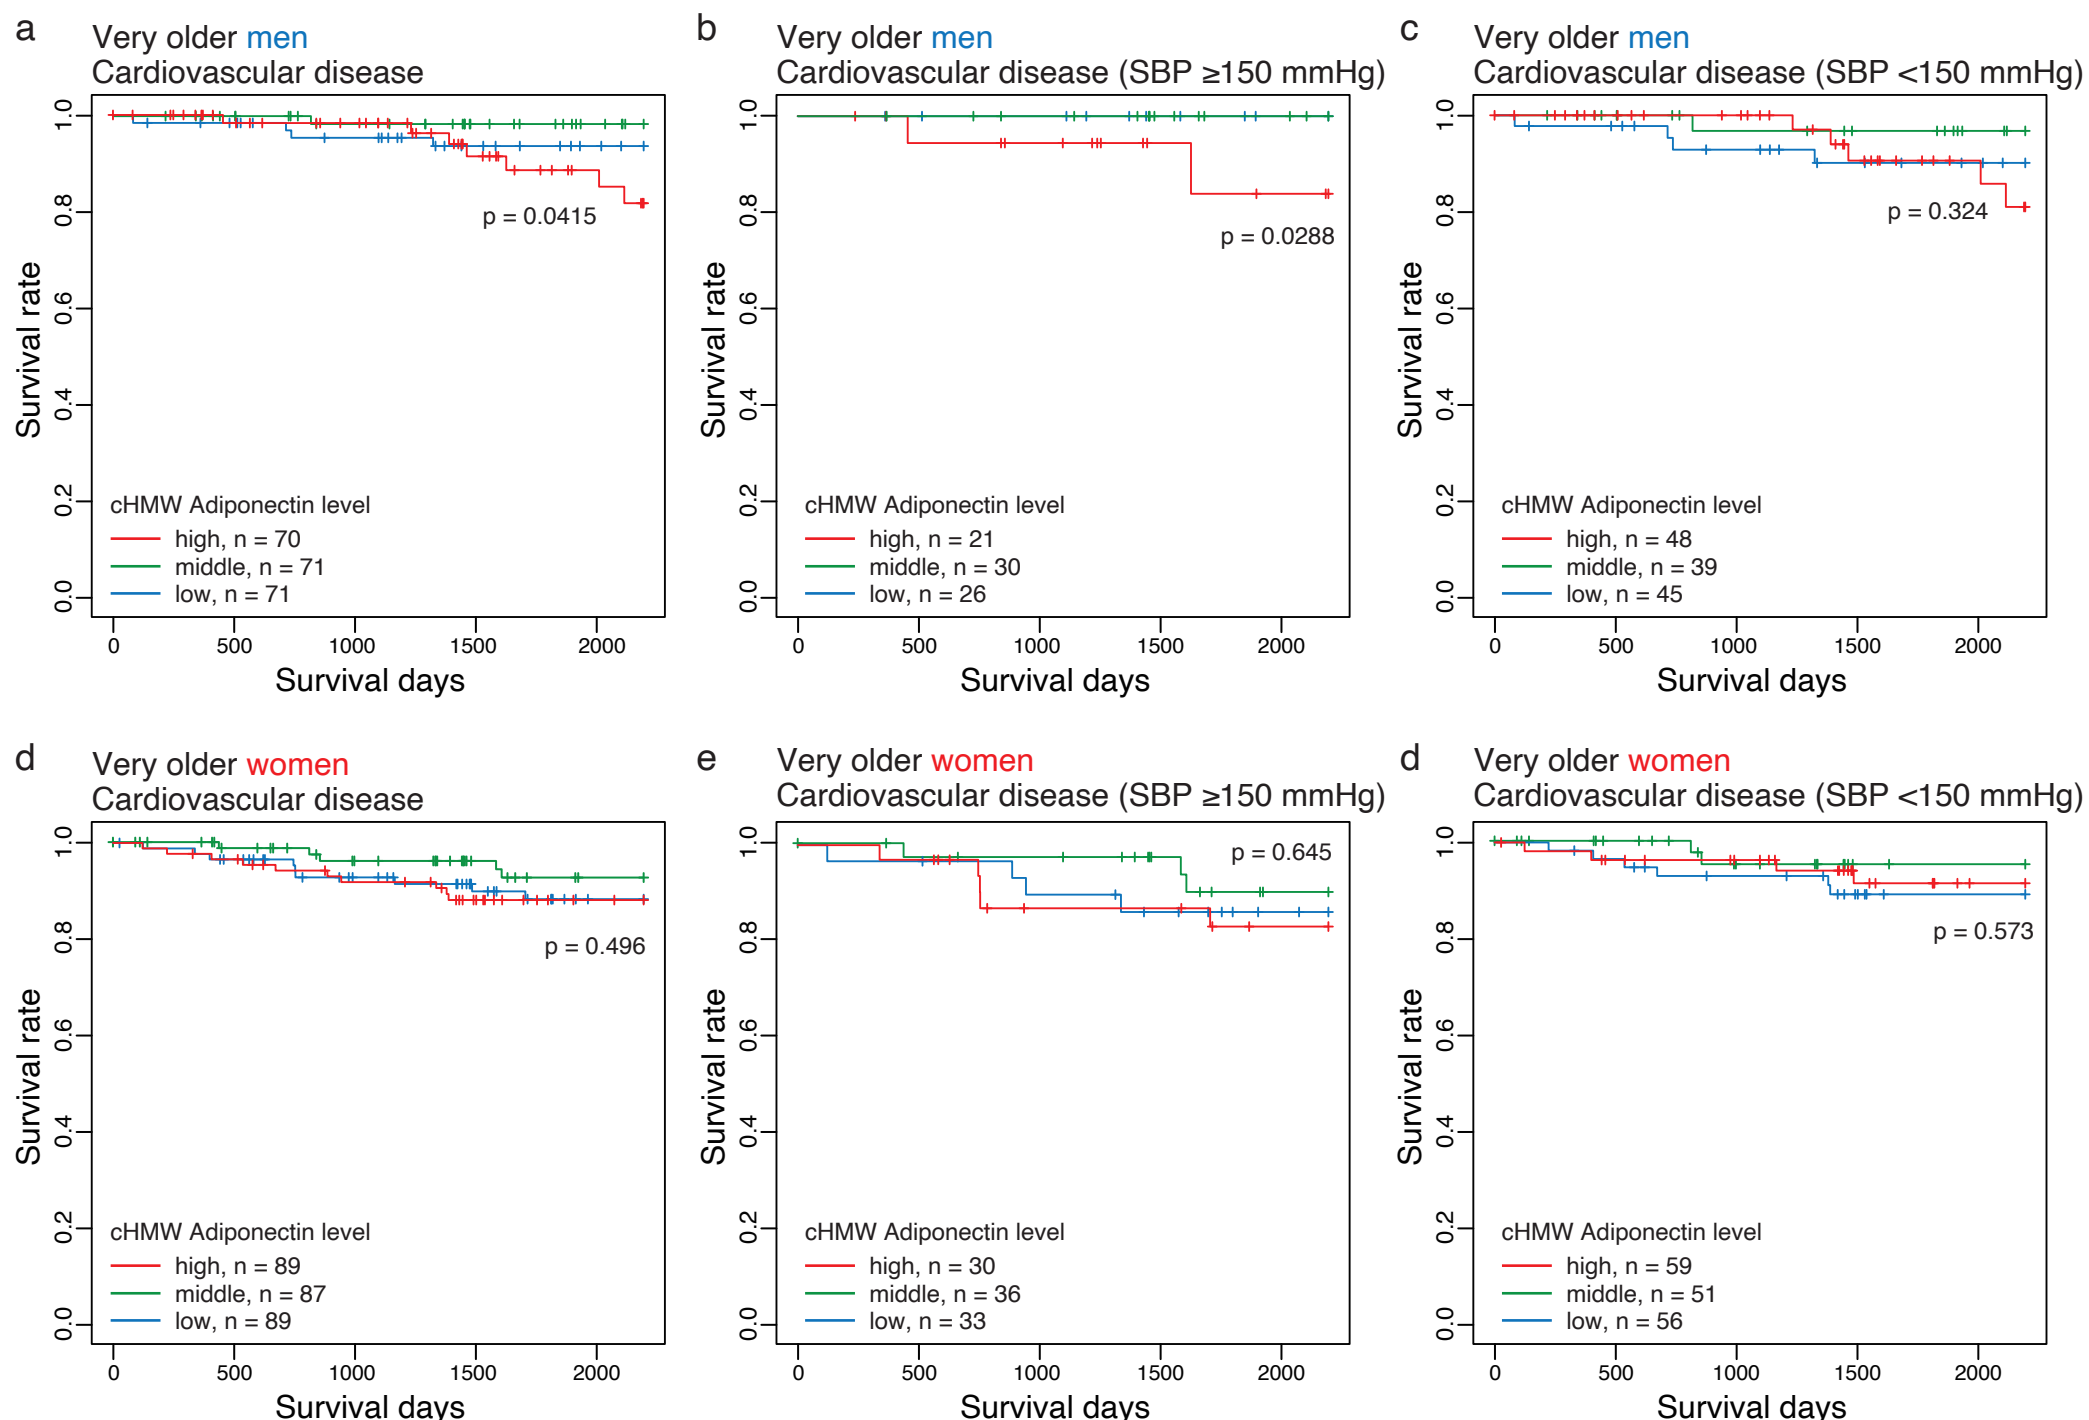

**Supplementary Fig. 7 | Survival time analysis for cardiovascular disease-cause mortality against the three quantile groups of cHMW adiponectin levels in very older men and women**

(a) Survival analysis for cardiovascular-cause mortality in very older men grouped by cHMW adiponectin level. The high cHMW adiponectin group in very older men showed a significant cardiovascular-cause mortality difference. (b), Survival analysis for cardiovascular-cause mortality in very older men grouped by cHMW adiponectin level and high blood pressure (SBP  $\geq 150$  mmHg). The high cHMW adiponectin group in very older men with high blood pressure (SBP  $\geq 150$  mmHg) showed a significant cardiovascular-cause mortality difference. (c), Survival analysis for cardiovascular-cause mortality in very older men grouped by cHMW adiponectin level without high blood pressure (SBP < 150 mmHg). No significant cardiovascular-cause mortality difference was observed among three cHMW adiponectin level groups without high blood pressure in very older men. (d), Survival analysis for cardiovascular-cause mortality in very older women grouped by cHMW adiponectin level. No significant cardiovascular-cause mortality difference was observed among three cHMW adiponectin level groups in very older women. (e), Survival analysis for cardiovascular-cause mortality in very older women grouped by cHMW adiponectin level and high blood pressure (SBP  $\geq 150$  mmHg). No significant cardiovascular-cause mortality difference was observed among three cHMW adiponectin level groups with high blood pressure (SBP  $\geq 150$  mmHg) in very older women. (f), Survival analysis for cardiovascular-cause mortality in very older women grouped by cHMW adiponectin level and no high blood pressure (SBP < 150 mmHg). No significant cardiovascular-cause mortality difference was observed among three cHMW adiponectin level groups without high blood pressure (SBP < 150 mmHg) in very older women.

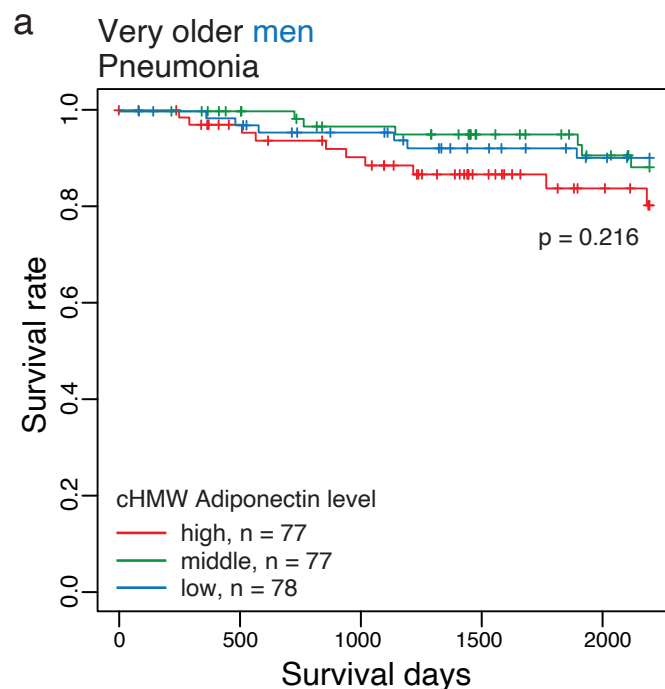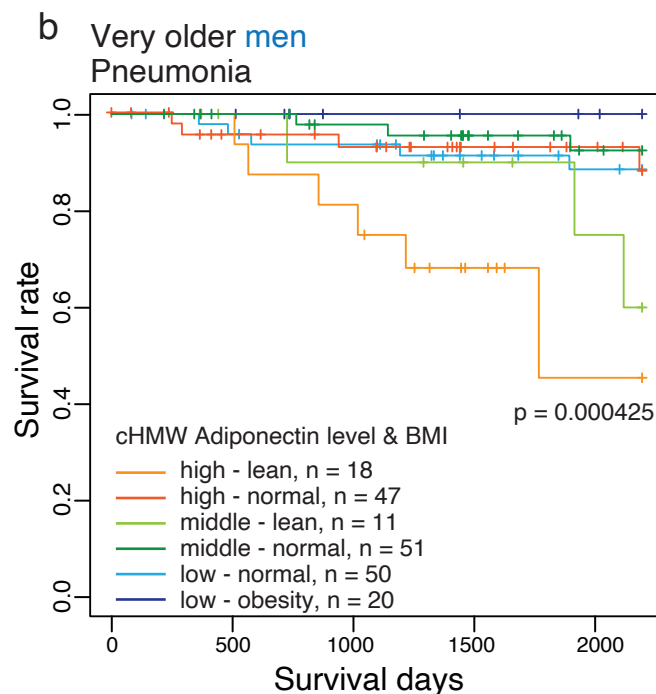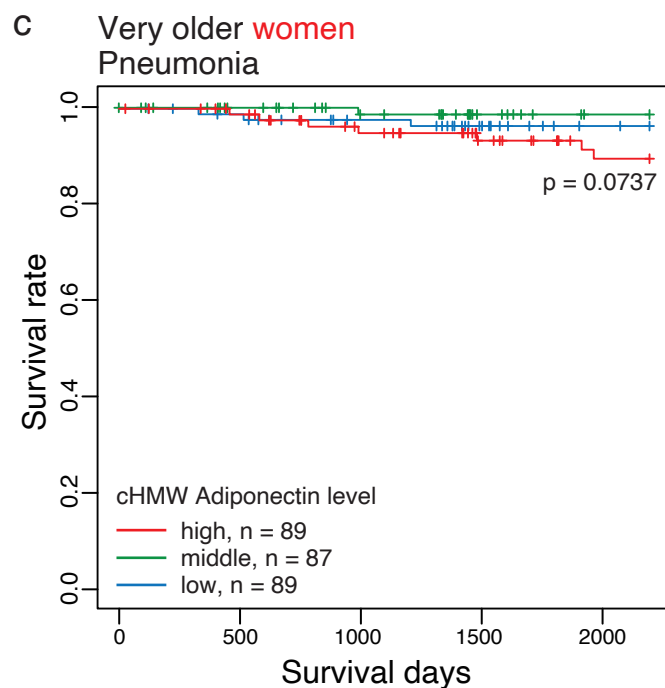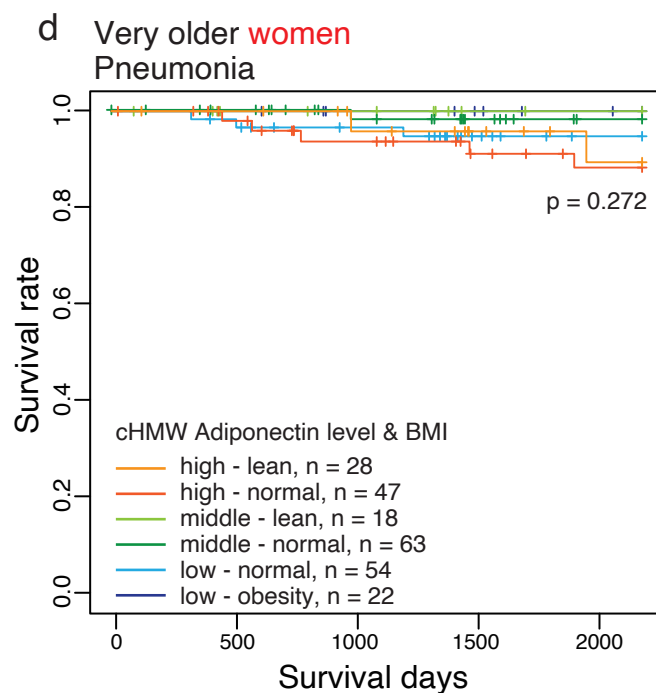

# **Supplementary Fig. 8 | Survival time analysis for pneumonia-cause mortality against the three quantile groups of cHMW adiponectin levels in very older men and women**

(a) Survival analysis for pneumonia-cause mortality in very older men grouped by cHMW adiponectin level. There was no significant pneumonia-cause mortality difference among three cHMW adiponectin level groups in very older men. (b) Survival analysis for pneumonia-cause mortality in very older men grouped by combination cHMW adiponectin level and BMI (lean BMI < 18.5, normal BMI 18.5 ~ 25.0, obesity BMI ≥ 25.0). The high cHMW adiponectin group with low BMI (SBP ≥ 150mmHg) in very older men showed a significant pneumonia-cause mortality difference. (c) Survival analysis for pneumonia-cause mortality in very older women grouped by cHMW adiponectin level. There was no significant pneumonia-cause mortality difference among three cHMW adiponectin level groups in very older women. (d) Survival analysis for pneumonia-cause mortality in very older women grouped by combination cHMW adiponectin level and BMI (lean BMI < 18.5, normal BMI 18.5 ~ 25.0, obesity BMI ≥ 25.0). There was no significant pneumonia-cause mortality difference in any combination cHMW adiponectin level groups and BMI in very older women.

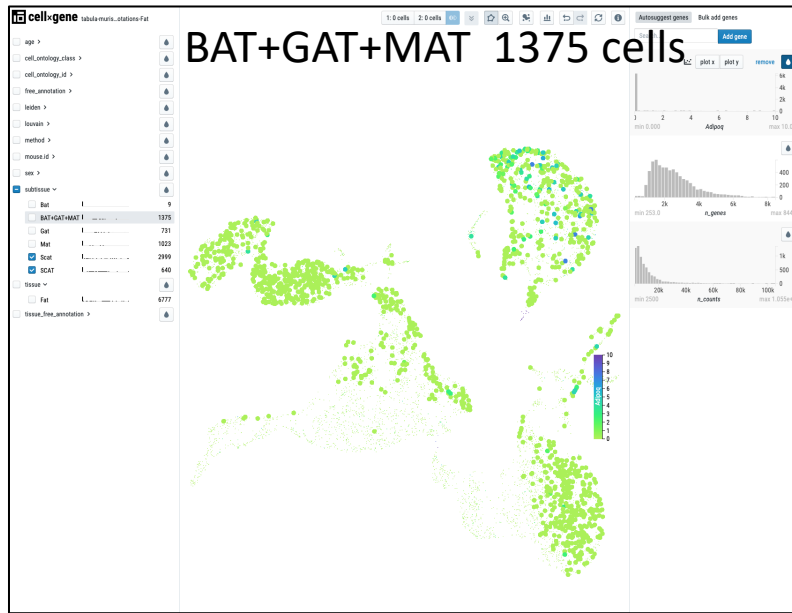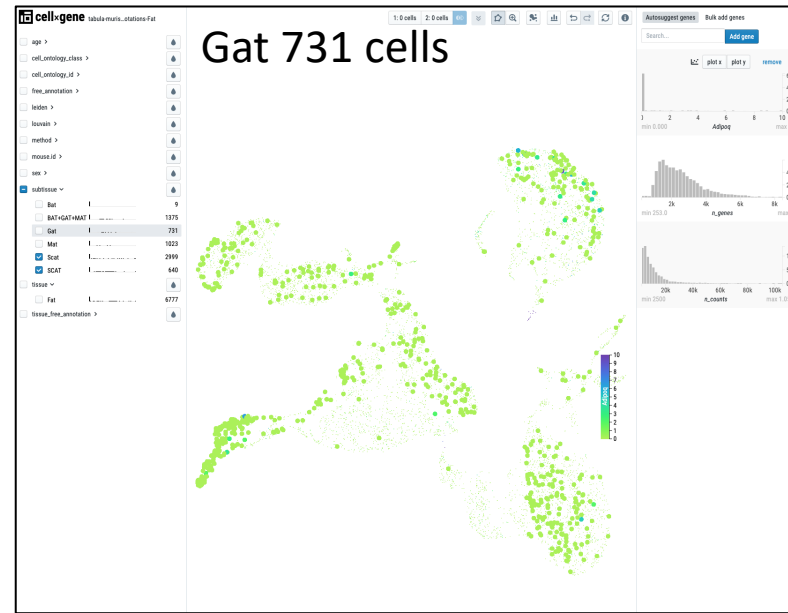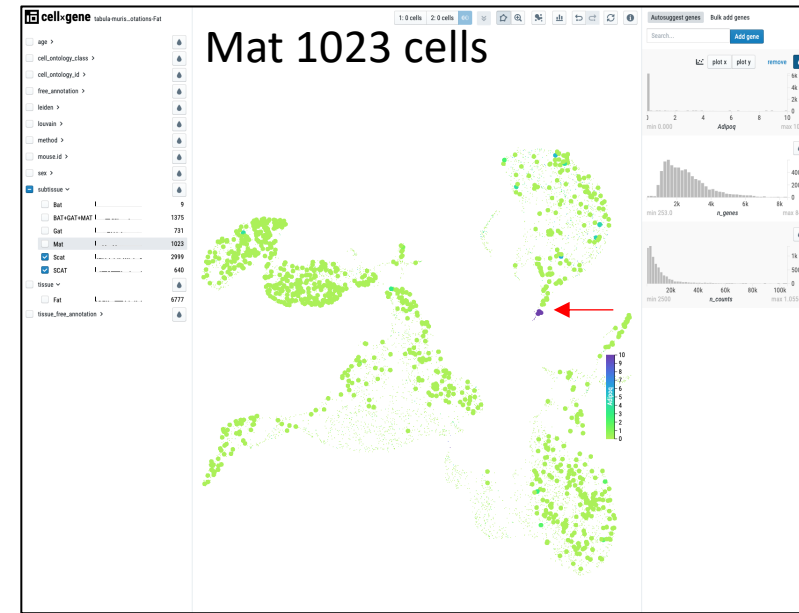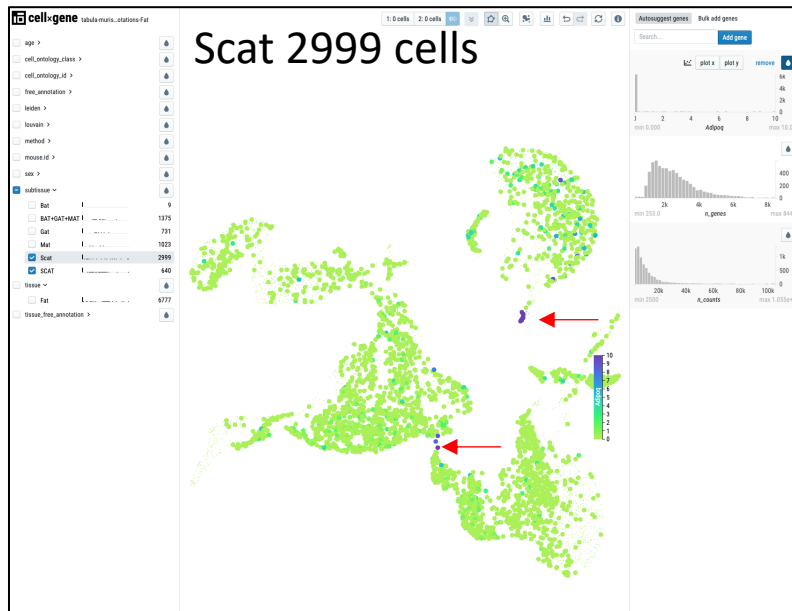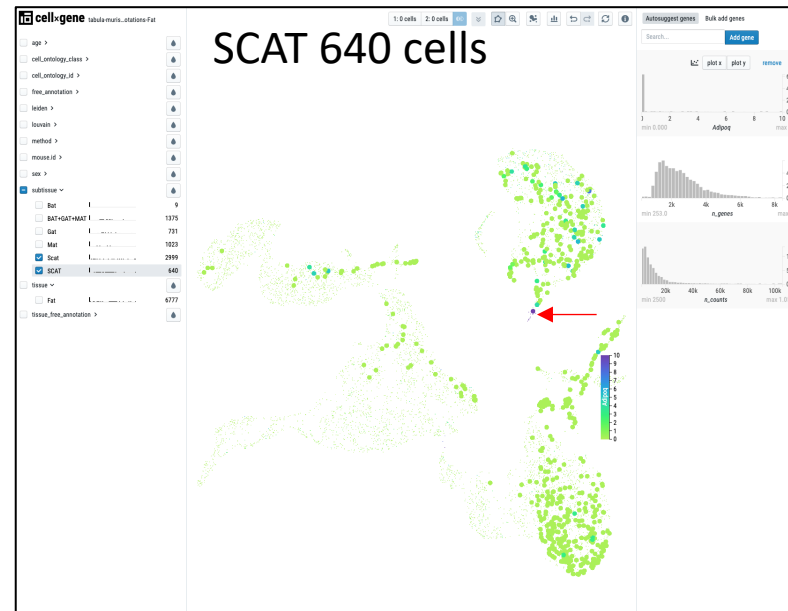

## Supplementary Fig. 9 | Adiponectin mRNA expression analysis of single-cell RNA-seq for four kinds of mouse adipose tissue.

We re-analyzed single-cell RNA-seq results (<https://tabula-muris-senis.ds.czbiohub.org/fat/droplet/>) for four kinds of mouse adipose tissues including brown adipose tissue (Bat), gonadal adipose tissue (Gat), mesenteric adipose tissue (Mat), and subcutaneous adipose tissue (Scat). Dots with the blue color indicated adiponectin-expressed cells. These single-cell RNA-seq results suggested that Scat is one of the major adiponectin-expressed cells in adipose tissues.

## non fat tissue

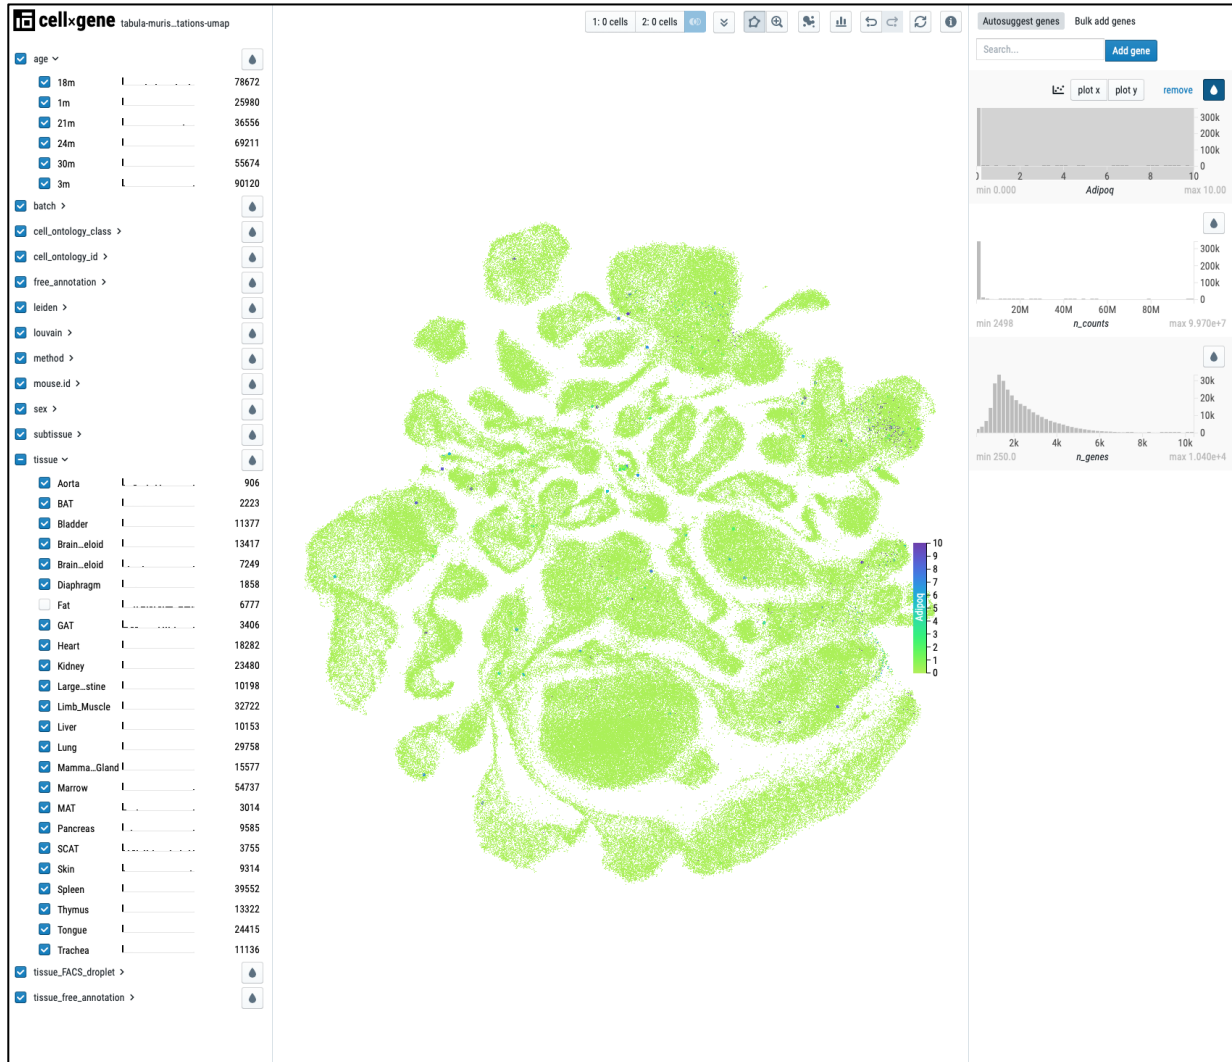

## adipose tissue

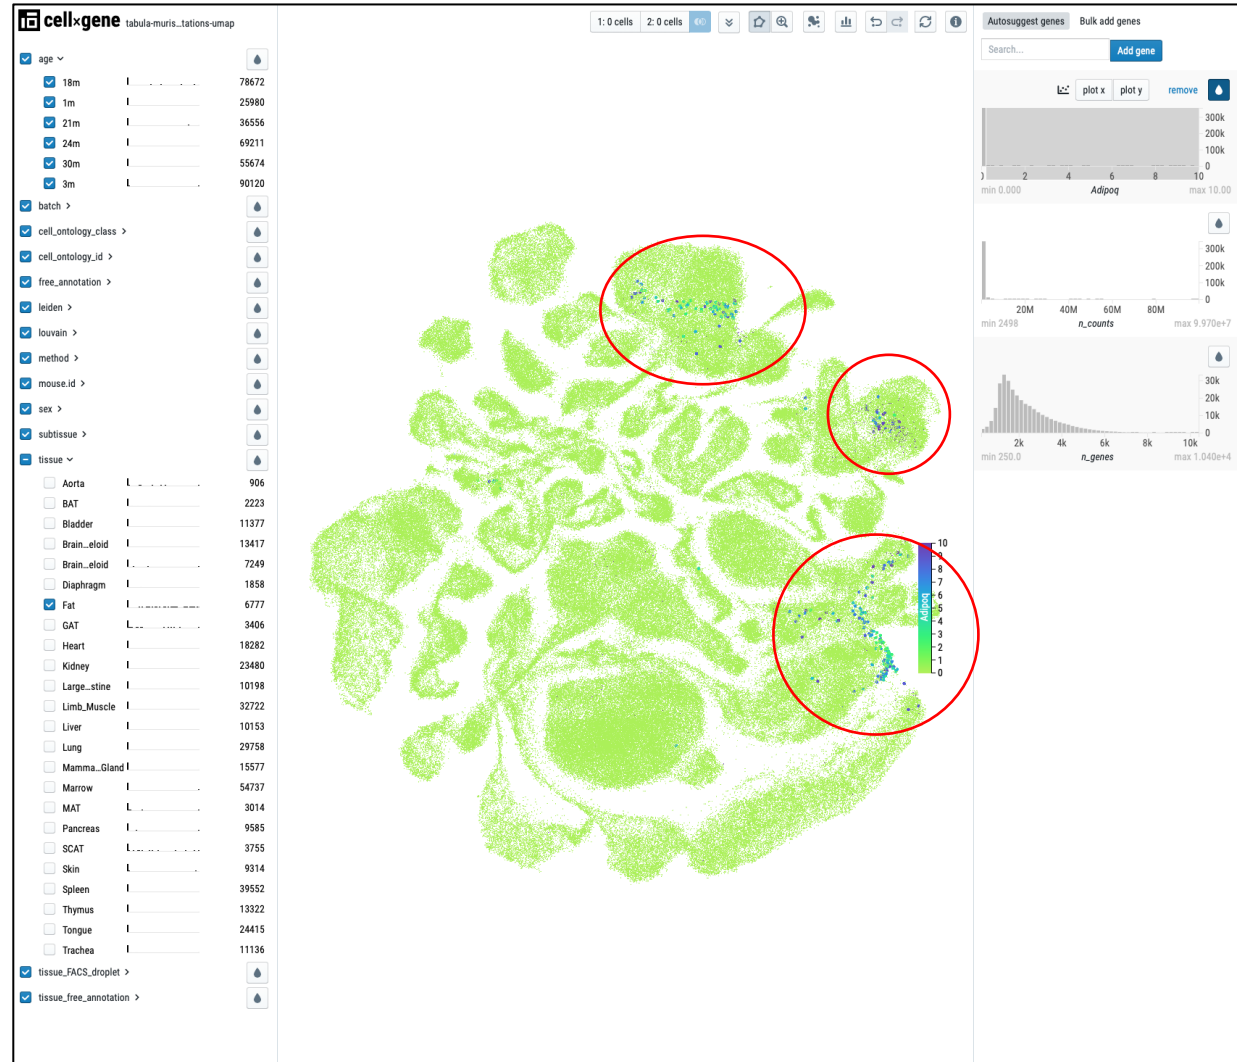

### Supplementary Fig. 10 | Ectopic expression of adiponectin with aging in mouse

We re-analyzed single-cell RNA-seq results of 24 kinds of tissue in 1, 3, 18, 21, 24, 30 months (<https://tabula-muris-senis.ds.czbiohub.org/fat/droplet/>). Major adiponectin-expressed cells were adipose tissue and no obvious ectopic adiponectin expression was observed in the time series of mouse cells.
