# Supplementary material for: Status and physiological significance of circulating adiponectin in the very old to centenarians
Source: Research Square preprint supplement (doi:10.21203/rs.3.rs-1732332/v1), 2022-06-30
Supplement: Supplementary file 2 [file c2504b6ba1804ab146acee1d.xlsx]

## Sheet: Supplementary Table 2
	Supplementary Table 2. Coefficients for glm analysis of plasma HMW adiponectin level in VeryOld men (n=639)
	Estimate	Estimate	Std. Error	t-value	Pr(>|t|)	OR (95%CI)
	(Intercept)	9.2568	0.3897	23.7567	0	10476	(4881.10 - 22484.07)
	CDH13 rs4783244	-1.9064	0.3287	-5.7994	0	0.1486	(0.08 - 0.28)
	HDLC	1.8275	0.2311	7.9066	0	6.2182	(3.95 - 9.78)
	LDH	1.006	0.2124	4.7366	0	2.7348	(1.80 - 4.15)
	TG	-0.9376	0.2393	-3.919	0.0001	0.3916	(0.25 - 0.63)
	NTproBNP	0.756	0.2167	3.4893	0.0005	2.1298	(1.39 - 3.26)
	CHE	-0.659	0.226	-2.9158	0.0037	0.5174	(0.33 - 0.81)
	Hand Grip	-0.5573	0.2132	-2.6137	0.0092	0.5727	(0.38 - 0.87)
	ALB	-0.5322	0.2186	-2.4347	0.0152	0.5873	(0.38 - 0.9)
	gamma GTP	-0.554	0.2277	-2.4335	0.0152	0.5747	(0.37 - 0.9)
	BMI	-0.5267	0.2239	-2.3526	0.019	0.5906	(0.38 - 0.92)
	Renal diseaase	1.4348	0.6747	2.1265	0.0339	4.1988	(1.12 - 15.76)
	ADIPOQ rs11711353	0.5851	0.3028	1.9324	0.0538	1.7951	(0.99 - 3.25)
	CstC	0.4586	0.2378	1.9282	0.0543	1.5818	(0.99 - 2.52)
	IADL score	-0.3917	0.2046	-1.9147	0.056	0.6759	(0.45 - 1.01)
	Heart disease	-0.5211	0.451	-1.1554	0.2484	0.5939	(0.25 - 1.44)
	FX	0.5374	0.4875	1.1022	0.2708	1.7115	(0.66 - 4.45)
	Age	0.2144	0.2073	1.0341	0.3015	1.2391	(0.83 - 1.86)
	ALT	-0.1435	0.2276	-0.6304	0.5287	0.8664	(0.55 - 1.35)
	HBA1c	0.1078	0.2072	0.5202	0.6031	1.1138	(0.74 - 1.67)
	years of education	-0.036	0.205	-0.1754	0.8608	0.9647	(0.65 - 1.44)
	UA	0.0178	0.2176	0.0816	0.935	1.0179	(0.66 - 1.56)

## Sheet: Supplementary Table 3
	Supplementary Table 3. Coefficients for glm analysis of plasma HMW adiponectin level in VeryOld women (n=675)
	Estimate	Estimate	Std. Error	t-value	Pr(>|t|)	OR (95%CI)
	(Intercept)	13.231	0.4369	30.2861	0	557353	(236734.94 - 1312194.83)
	CDH13 rs4783244	-2.9864	0.3634	-8.2168	0	0.0505	(0.02 - 0.10)
	HDLC	2.4801	0.2753	9.0076	0	11.9422	(6.96 - 20.49)
	BMI	-1.9425	0.2486	-7.8145	0	0.1433	(0.09 - 0.23)
	HBA1c	-0.8603	0.2386	-3.6047	0.0003	0.4231	(0.27 - 0.68)
	NTproBNP	0.8561	0.2652	3.2282	0.0013	2.3539	(1.40 - 3.96)
	TG	-0.8824	0.2813	-3.1372	0.0018	0.4138	(0.24 - 0.72)
	ADIPOQ rs11711353	0.9875	0.3403	2.9017	0.0038	2.6844	(1.38 - 5.23)
	LDH	0.6904	0.2423	2.8495	0.0045	1.9946	(1.24 - 3.21)
	ALB	-0.6287	0.2437	-2.5797	0.0101	0.5333	(0.33 - 0.86)
	years of education	-0.5943	0.2331	-2.5498	0.011	0.552	(0.35 - 0.87)
	FX	0.9043	0.4777	1.8929	0.0588	2.4701	(0.97 - 6.30)
	UA	-0.3513	0.2727	-1.2883	0.1981	0.7038	(0.41 - 1.20)
	Age	0.2556	0.2345	1.0901	0.2761	1.2912	(0.82 - 2.04)
	Hand Grip	-0.2326	0.2513	-0.9256	0.355	0.7925	(0.48 - 1.30)
	CstC	0.1958	0.3017	0.6492	0.5165	1.2163	(0.67 - 2.20)
	Heart disease	-0.3228	0.5849	-0.5519	0.5812	0.7241	(0.23 - 2.28)
	ALT	-0.1258	0.2418	-0.5202	0.6031	0.8818	(0.55 - 1.42)
	gamma GTP	-0.1094	0.2377	-0.4603	0.6454	0.8964	(0.56 - 1.43)
	CHE	-0.0828	0.2452	-0.3376	0.7358	0.9206	(0.57 - 1.49)
	Renal diseaase	-0.2007	0.8756	-0.2292	0.8188	0.8182	(0.15 - 4.55)
	IADL score	0.0227	0.2441	0.0929	0.926	1.0229	(0.63 - 1.65)

## Sheet: Supplementary Table 4
	Supplementary Table 4. Coefficients for glm analysis of plasma HMW adiponectin level in VeryOld (n=1314)
		Estimate	Std. Error	t-value	Pr(>|t|)	OR (95%CI)
	(Intercept)	10.8257	0.3871	27.9691	0	50294.8	(23553.32 - 107397.27)
	CDH13 rs4783244	-2.4361	0.2492	-9.7758	0	0.0875	(0.05 - 0.14)
	HDLC	2.3071	0.1898	12.1555	0	10.0455	(6.92 - 14.57)
	BMI	-1.3016	0.1709	-7.6155	0	0.2721	(0.19 - 0.38)
	TG	-0.9132	0.1858	-4.9157	0	0.4012	(0.28 - 0.58)
	LDH	0.8545	0.1647	5.1875	0	2.3502	(1.70 - 3.25)
	NTproBNP	0.7667	0.1683	4.5548	0	2.1526	(1.55 - 2.99)
	ADIPOQ rs11711353	0.7902	0.2304	3.4298	0.0006	2.2039	(1.40 - 3.46)
	ALB	-0.5627	0.1657	-3.3953	0.0007	0.5696	(0.41 - 0.79)
	HBA1c	-0.3895	0.16	-2.4345	0.015	0.6774	(0.50 - 0.93)
	FX	0.803	0.3455	2.3241	0.0203	2.2323	(1.13 - 4.39)
	CstC	0.4387	0.1905	2.303	0.0214	1.5506	(1.07 - 2.25)
	Hand Grip	-0.506	0.2359	-2.1449	0.0321	0.6029	(0.38 - 0.96)
	gamma GTP	-0.3189	0.1643	-1.9404	0.0525	0.727	(0.53 - 1.00)
	CHE	-0.3318	0.1724	-1.9251	0.0544	0.7176	(0.51 - 1.01)
	sex	0.8711	0.4966	1.7542	0.0796	2.3896	(0.90 - 6.33)
	UA	-0.2656	0.1807	-1.4697	0.1419	0.7668	(0.54 - 1.09)
	IADL score	-0.2309	0.1604	-1.4398	0.1502	0.7938	(0.58 - 1.09)
	years of education	-0.2334	0.163	-1.432	0.1524	0.7919	(0.58 - 1.09)
	Renal disease	0.7265	0.5504	1.3199	0.1871	2.0679	(0.70 - 6.08)
	Age	0.1769	0.1586	1.1159	0.2647	1.1935	(0.87 - 1.63)
	Heart disease	-0.4024	0.3667	-1.0973	0.2727	0.6687	(0.33 - 1.37)
	ALT	-0.126	0.1626	-0.7752	0.4384	0.8816	(0.64 - 1.21)

## Sheet: Supplementary Table 5
	Supplementary Table 5. Coefficients for glm analysis of plasma HMW adiponectin level in Centenarian men (n=63)
	Estimate	Estimate	Std. Error	t-value	Pr(>|t|)	OR (95%CI)
	(Intercept)	22.9195	1.1899	19.2619	0	8.99 x 109	(8.73 x 108 - 9.26 x 1010)
	CDH13 rs4783244	-5.9466	1.4195	-4.1891	0.0001	2.60 x 103	(0.0002 - 0.0422)
	Age	3.0381	0.9679	3.139	0.0027	20.8663	(3.13 - 139.10)
	HDLC	2.7204	1.0843	2.5089	0.0151	15.187	(1.81 - 127.20)
	SBP	-1.5231	0.9911	-1.5368	0.1301	0.218	(0.031 - 1.52)
	NTproBNP	0.9513	0.9573	0.9937	0.3247	2.5892	(0.40 - 16.90)
	TG	-0.5692	0.9391	-0.6061	0.5469	0.566	(0.090 - 3.57)
	Education	-0.4521	1.0302	-0.4389	0.6625	0.6363	(0.085 - 4.79)

## Sheet: Supplementary Table 6
	Supplementary Table 6. Coefficients for glm analysis of plasma HMW adiponectin level in Centenarian women (n=289)
	Estimate	Estimate	Std. Error	t-value	Pr(>|t|)	OR (95%CI)
	(Intercept)	21.7027	0.8202	26.4591	0	2.66 x 109	(5.34 x 108 - 1.33 x 1010)
	HDLC	4.3146	0.6238	6.9167	0	74.78	(22.02 - 253.96)
	CDH13 rs4783244	-2.3547	1.0146	-2.3209	0.021	0.0949	(0.013 - 0.69)
	TG	-1.387	0.6054	-2.2909	0.0227	0.2498	(0.076 - 0.82)
	age2	1.2801	0.6269	2.0421	0.0421	3.5972	(1.05 - 12.29)
	SBP	-0.8155	0.6075	-1.3424	0.1805	0.4424	(0.14 - 1.46)
	NTproBNP	0.6558	0.5982	1.0964	0.2739	1.9268	(0.60 - 6.22)
	Education	-0.6446	0.5964	-1.0809	0.2807	0.5249	(0.16 - 1.69)

## Sheet: Supplementary Table 7
	Supplementary Table 7. Coefficients for glm analysis of plasma HMW adiponectin level in Centenarian (n=352)
		Estimate	Std. Error	t-value	Pr(>|t|)	OR (95%CI)
	(Intercept)	22.0021	0.7093	31.0207	0	3.59 x 109	(8.95 x 108 - 1.44 x 1010)
	CDH13 rs4783244	3.9495	0.5543	7.125	0	51.9112	(17.52 - 153.85)
	HDLC	-3.141	0.868	-3.6185	0.0003	0.0432	(0.01 - 0.24)
	BMI	1.654	0.5501	3.0068	0.0028	5.2278	(1.78 - 15.37)
	TG	-1.2003	0.5285	-2.2713	0.0237	0.3011	(0.11 - 0.85)
	LDH	-0.9301	0.5313	-1.7508	0.0809	0.3945	(0.14 - 1.12)
	NTproBNP	-0.9021	0.5273	-1.7106	0.0881	0.4057	(0.14 - 1.14)
	ADIPOQ rs11711353	0.8047	0.5186	1.5515	0.1217	2.236	(0.81 - 6.18)

## Sheet: Supplementary Table 8
	Supplementary Table 8. Analysis of variance of plasma HMW adiponectin level by ANOVA in VeryOld men (n=639)
		Df	Deviance	Resid.Df	Resid.Dev	F	Pr(>F)		rho%
	NULL	638	24942
	HDLC	1	3080.31	637	21861.7	124.115	<2.20E-16	***	0.122504
	BMI	1	1781.56	636	20080.1	71.7844	<2.20E-16	***	0.0704331
	CDH13 rs4783244	1	835.09	635	19245	33.6482	1.055e-08	***	0.0324862
	CHE	1	682.78	634	18562.3	27.5111	2.15e-07	***	0.0263797
	TG	1	658	633	17904.3	26.5128	3.526e-07	***	0.0253862
	LDH	1	504.21	632	17400	20.316	7.856e-06	***	0.0192203
	ALB	1	492.27	631	16907.8	19.8349	1.002e-05	***	0.0187415
	NTproBNP	1	323.49	630	16584.3	13.0343	0.0003307	***	0.0119746
	Hand grip	1	316.73	629	16267.6	12.762	0.0003813	***	0.0117036
	Renal disease	1	276.18	628	15991.4	11.1283	0.0009012	***	0.0100778
	Age	1	245.15	627	15746.2	9.8779	0.001753	**	0.00883376
	IADL score	1	176.43	626	15569.8	7.1087	0.007872	**	0.00607857
	ADIPOQ rs11711353	1	92.68	625	15477.1	3.7342	0.0537659	.	0.00272078
	CstC	1	92.26	624	15384.9	3.7174	0.0543082	.	0.00270394
	FX	1	37.06	623	15347.8	1.4932	0.222181		0.000490802
	Heart disease	1	17.03	622	15330.8	0.6861	0.407801		-0.000312262
	Years of Education	1	10.74	621	15320	0.4325	0.510987		-0.000312262
	UA	1	4.89	620	15315.1	0.1971	0.657247		-0.000312262
	ALT	1	2.03	619	15313.1	0.0819	0.774797		-0.000312262
	HBA1c	1	0.14	618	15313	0.0055	0.940867		-0.000312262
	gamma GTP	1	0	617	15313	0.0001	0.993687		-0.000312262

## Sheet: Supplementary Table 9
	Supplementary Table 9. Analysis of variance of plasma HMW adiponectin level by ANOVA in VeryOld women (n=675)
		Df	Deviance	Resid.Df	Resid.Dev	F	Pr(>F)		rho%
	NULL	674	39857
	BMI	1	6510	673	33347	188.269	<2.20E-16	***	0.162466
	HDLC	1	5098.6	672	28248.4	147.452	<2.20E-16	***	0.127055
	CDH13 rs4783244	1	2288.9	671	25959.5	66.1949	2.064e-15	***	0.0565603
	HBA1c	1	1084.3	670	24875.2	31.357	3.164e-08	***	0.0263372
	TG	1	470.3	669	24404.9	13.5998	0.000245	***	0.0109321
	LDH	1	433.9	668	23971	12.5491	0.0004246	***	0.0100189
	NTproBNP	1	392.3	667	23578.7	11.3465	0.0008003	***	0.00897514
	ADIPOQ rs11711353	1	291.2	666	23287.5	8.4201	0.0038359	**	0.00643857
	ALB	1	201	665	23086.5	5.8127	0.0161857	*	0.00417548
	Age	1	153.6	664	22932.9	4.4433	0.0354195	*	0.00298623
	CHE	1	115.5	663	22817.4	3.3417	0.0680007	.	0.00203031
	FX	1	77.9	662	22739.5	2.253	0.133842		0.00108694
	Hand grip	1	61.2	661	22678.3	1.7693	0.183928		0.000667939
	Renal disease	1	29.4	660	22648.9	0.8488	0.357226		-0.000129913
	UA	1	22.8	659	22626.1	0.6601	0.416818		-0.000295505
	CstC	1	16.5	658	22609.6	0.4782	0.489485		-0.00045357
	Years of Education	1	16	657	22593.6	0.4638	0.496108		-0.000466115
	Heart disease	1	11	656	22582.6	0.3195	0.572077		-0.000466115
	IADL score	1	2.3	655	22580.3	0.0654	0.798309		-0.000466115
	ALT	1	0.5	654	22579.8	0.0137	0.906923		-0.000466115
	gamma GTP	1	0.4	653	22579.4	0.0119	0.913077		-0.000466115
									0.416521

## Sheet: Supplementary Table 10
	Supplementary Table 10. Analysis of variance of plasma HMW adiponectin level by ANOVA in Centenarian men (n=63)
		Df	Deviance	Resid. Df	Resid. Dev	F	Pr(>F)		rho%
	NULL	62	4650.9
	CDH13 rs4783244	1	837.85	61	3813.05	17.5486	0.0001022	***	0.169882
	HDLC	1	397.4	60	3415.65	8.3234	0.0055794	**	0.0751803
	age2	1	391.54	59	3024.11	8.2008	0.0059158	**	0.0739203
	SBP	1	308.37	58	2715.74	6.4589	0.0138892	*	0.0560378
	NTproBNP	1	86.96	57	2628.78	1.8213	0.182688		0.00843192
	TG	1	1.65	56	2627.13	0.0346	0.853046		0
	Education	1	1.21	55	2625.92	0.0253	0.874231		0
									0.383453

## Sheet: Sup. Table 11. AOV CENwomen 
	Supplementary Table 11. Analysis of variance of plasma HMW adiponectin level by ANOVA in Centenarian women (n=289)
		Df	Deviance	Resid. Df	Resid. Dev	F	Pr(>F)		rho%
	NULL	288	34284
	HDLC	1	5481.6	287	28802.4	56.2394	8.447e-13	***	0.157045
	TG	1	588.9	286	28213.5	6.0422	0.01457	*	0.0143341
	rs4783244	1	525	285	27688.5	5.3865	0.02101	*	0.0124703
	age2	1	115.3	284	27573.2	1.1832	0.27763		0.000520096
	education	1	83.2	283	27490	0.8534	0.3564		-0.000416201
	NTproBNP	1	63	282	27427	0.6463	0.42212		0
	SBP	1	38.2	281	27388.8	0.3923	0.5316		0
